# Supplementary material for: How Changes in Anti-SD Sequences Would Affect SD Sequences in Escherichia coli and Bacillus subtilis
Source: PubMed Central journal article supplement (PMC5427494; doi:10.1534/g3.117.039305), 2017-03-31
Supplement: 1607TableS1.pdf [file 1607TableS1.pdf]

**Table S1.** All SD<sub>Bs</sub> hits with 3'AUCU-ending of the 3'TAIL of *B. subtilis*.

| SD <sub>Bs</sub> motifs | Occurrence in <i>B. subtilis</i> |            | Occurrence in <i>E.coli</i> |            |
|-------------------------|----------------------------------|------------|-----------------------------|------------|
|                         | Count                            | Proportion | Count                       | Proportion |
| UAGA                    | 7                                | 0.0017     | 23                          | 0.0053     |
| UAGAA                   | 13                               | 0.0031     | 12                          | 0.0028     |
| UAGAAA                  | 22                               | 0.0055     | 9                           | 0.0021     |
| UAGAAAG                 | 16                               | 0.0038     | 0                           | 0.0000     |
| UAGAAAGG                | 13                               | 0.0031     | 2                           | 0.0005     |
| UAGAAAGGA               | 17                               | 0.0038     | 0                           | 0          |
| UAGAAAGGAG              | 6                                | 0.0014     | 1                           | 0.0002     |
| UAGAAAGGAGG             | 2                                | 0.0005     | 0                           | 0          |
| UAGAAAGGAGGU            | 1                                | 0.0002     | 0                           | 0          |
| Subtotal                | 97                               | 0.0022     | 47                          | 0.0109     |
| AGAA                    | 10                               | 0.0029     | 54                          | 0.0125     |
| AGAAA                   | 50                               | 0.0122     | 77                          | 0.0181     |
| AGAAAG                  | 48                               | 0.0115     | 20                          | 0.0046     |
| AGAAAGG                 | 42                               | 0.0101     | 6                           | 0.0014     |
| AGAAAGGA                | 43                               | 0.0103     | 6                           | 0.0014     |
| AGAAAGGAG               | 22                               | 0.0053     | 3                           | 0.0007     |
| AGAAAGGAGG              | 9                                | 0.0022     | 1                           | 0.0002     |
| AGAAAGGAGGU             | 0                                | 0          | 0                           | 0          |
| AGAAAGGAGGUG            | 0                                | 0          | 0                           | 0          |
| Subtotal                | 224                              | 0.0544     | 167                         | 0.0389     |
| GAAA                    | 15                               | 0.0046     | 74                          | 0.0171     |
| GAAAG                   | 38                               | 0.0091     | 36                          | 0.0083     |
| GAAAGG                  | 68                               | 0.0163     | 20                          | 0.0046     |
| GAAAGGA                 | 51                               | 0.0120     | 16                          | 0.0037     |
| GAAAGGAG                | 57                               | 0.0137     | 11                          | 0.0025     |

|              |      |        |     |        |
|--------------|------|--------|-----|--------|
| GAAAGGAGG    | 18   | 0.0043 | 1   | 0.0002 |
| GAAAGGAGGU   | 3    | 0.0007 | 0   | 0      |
| GAAAGGAGGUG  | 1    | 0.0002 | 0   | 0      |
| GAAAGGAGGUGA | 1    | 0.0002 | 0   | 0      |
| Subtotal     | 252  | 0.0565 | 158 | 0.0366 |
| AAAG         | 18   | 0.0060 | 46  | 0.0107 |
| AAAGG        | 162  | 0.0395 | 87  | 0.0201 |
| AAAGGA       | 76   | 0.0182 | 107 | 0.0248 |
| AAAGGAG      | 222  | 0.0532 | 65  | 0.0150 |
| AAAGGAGG     | 143  | 0.0343 | 6   | 0.0014 |
| AAAGGAGGU    | 31   | 0.0074 | 3   | 0.0007 |
| AAAGGAGGUG   | 6    | 0.0014 | 0   | 0      |
| AAAGGAGGUGA  | 3    | 0.0007 | 1   | 0.0002 |
| AAAGGAGGUGAU | 0    | 0      | 0   | 0      |
| Subtotal     | 661  | 0.1607 | 315 | 0.0729 |
| Total        | 1234 | 0.2932 | 687 | 0.1590 |
